# Supplementary material for: Attenuated Total Reflection Fourier-Transform Infrared Spectral Discrimination in Human Tissue of Oesophageal Transformation to Adenocarcinoma
Source: MDPI journal article supplement (doi:10.3390/jpm13081277), 2023-08-20
Supplement: s1 [file s1]

**Table S1.** Category-distinguishing wavenumbers for Normal *vs.* Inflammatory *vs.* Barrett's *vs.* LGD *vs.* HGD *vs.* OAC using spectra tissues samples obtained for SPA-QDA model

| Wavenumbers (cm <sup>-1</sup> ) | Tentative Assignments                                                                                                                |
|---------------------------------|--------------------------------------------------------------------------------------------------------------------------------------|
| ~1393                           | Symmetric CH <sub>3</sub> bending of the methyl groups of proteins [29, 41] or aliphatic side groups of the amino acid residues [30] |
| ~1540                           | Protein amide II absorption – predominately b-sheet of amide II [28]                                                                 |
| ~1589                           | Ring C-C stretching of phenyl [42]                                                                                                   |
| ~1640                           | Amide I band [23]                                                                                                                    |
| ~1690                           | Peak of nucleic acids due to the base carbonyl stretching and ring breathing mode [30]                                               |
| ~1745                           | Ester group (C=O) vibration of lipids [28, 31]                                                                                       |

## References

- 41 Wang, H.P., Wang, H.-C., Huang, Y.-J. Microscopic FTIR studies of lung cancer cells in pleural fluid. *Science of the Total Environment*, 1997, 204: 283–287.
- 29 Wood, B.R., Quinn, M.A., Burden, F.R., McNaughton, D. An investigation into FT-IR spectroscopy as a bio-diagnostic tool for cervical cancer. *Biospectroscopy*, 1996, 2: 143–153.
- 30 Chiriboga, L., Xie, P., Yee, H., Vigorita, V., Zarou, D., Zakim, D., Diem, M. Infrared spectroscopy of human tissue. I. Differentiation and maturation of epithelial cells in the human cervix. *Biospectroscopy*, 1998, 4: 47–53.
- 28 Wu, J.-G., Xu, Y.-Z., Sun, C.-W., Soloway, R.D., Xu, D.-F., Wu, Q.-G., Sun, K.-H., Weng, S.-F., and Xu, G.-X. Distinguishing malignant from normal oral tissues using FTIR fiber-optic techniques. *Biopolymer (Biospectroscopy)*, 2001, 62: 185–192
- 42 Movasaghi, Z., Rehman, S., ur Rehman, I. Fourier Transform Infrared (FTIR) Spectroscopy of Biological Tissues. *Applied Spectroscopy Reviews*, 2008, 43: 134–179.
- 23 Wood, B.R., Quinn, M.A., Tait, B., Ashdown, M., Hislop, T., Romeo, M., McNaughton, D. FTIR microspectroscopic study of cell types and potential confounding variables in screening for cervical malignancies. *Biospectroscopy*, 1998, 4: 75–91.
- 31 Sukuta, S., Bruch, R. Factor analysis of cancer Fourier transform infrared evanescent wave fiberoptical (FTIR-FEW) spectra. *Lasers in Surgery and Medicine*, 1999, 24: 382–388.
